# Supplementary material for: The chromosome-scale genome of Magnolia officinalis provides insight into the evolutionary position of magnoliids
Source: PubMed Central journal article supplement — iScience. 2021 Aug 17;24(9):102997. doi: 10.1016/j.isci.2021.102997 (PMC8417397; doi:10.1016/j.isci.2021.102997), 2021-08-17
Supplement: mmc1.pdf [file mmc1.pdf]

iScience, Volume 24

## Supplemental information

**The chromosome-scale genome  
of *Magnolia officinalis* provides insight  
into the evolutionary position of magnoliids**

**Yanpeng Yin, Fu Peng, Luoqing Zhou, Xianmei Yin, Junren Chen, Hongjin Zhong, Feixia Hou, Xiaofang Xie, Li Wang, Xiaodong Shi, Bo Ren, Jin Pei, Cheng Peng, and Jihai Gao**

**Table S1.** Raw reads statistics. Related to Table 1

| <b>Reads number</b> | <b>Total base(bp)</b> | <b>Read N50</b> | <b>Mean</b> | <b>Maximum</b> |
|---------------------|-----------------------|-----------------|-------------|----------------|
| 16,283,503          | 140,912,539,579       | 13,784          | 8,654       | 128,492        |

**Table S2.** Statistics of assembled *M. officinalis* assembly. Related to Table 1

|                           | <b>Canu<br/>assembly</b> | <b>Corrected<br/>assembly</b> | <b>Hi-C<br/>assembly</b> |
|---------------------------|--------------------------|-------------------------------|--------------------------|
| <b>Contig number</b>      | 12,562                   | 10,294                        | 11,562                   |
| <b>Contig length (bp)</b> | 1,558,051,600            | 1,684,361,614                 | 1,684,361,614            |
| <b>Contig N50 (bp)</b>    | 207,504                  | 302,541                       | 222,069                  |
| <b>Contig N90 (bp)</b>    | 55,725                   | 61,780                        | 61,049                   |
| <b>Contig max (bp)</b>    | 1,499,188                | 4,084,461                     | 2,700,203                |
| <b>GC content (%)</b>     | 40.61                    | 40.65                         | 40.65                    |

**Table S3.** Genome completeness assessment of *M. officinalis* genome by BUSCO.  
Related to Table 1

| Categories                      | Number | Percent (%) |
|---------------------------------|--------|-------------|
| Complete BUSCOs                 | 1391   | 86.20       |
| Complete and single-copy BUSCOs | 1307   | 81.00       |
| Complete and duplicated BUSCOs  | 84     | 5.20        |
| Fragmented BUSCOs               | 75     | 4.6         |
| Missing BUSCOs                  | 148    | 9.2         |

**Table S4.** Completeness analysis of *M. officinalis* genome based on CEG database.  
Related to Table 1

| Number <sup>1</sup> (458 of CEGs) | Percent <sup>1</sup> (%) | Number <sup>2</sup> (248 of CEGs) | Percent <sup>2</sup> (%) |
|-----------------------------------|--------------------------|-----------------------------------|--------------------------|
| 436                               | 95.19                    | 228                               | 91.93                    |

Note: **1.** Number and percentage of 458 core eukaryotic genes (CEGs) included in the genome assembly. **2.** Number and percentage of 248 highly conserved CEGs included in the genome assembly.

**Table S5.** Statistics of the genome assembly using Hi-C technology. Related to Fig. 1

| <b>Group</b>                         | <b>Sequence<br/>Number</b> | <b>Sequence Length<br/>(bp)</b> |
|--------------------------------------|----------------------------|---------------------------------|
| Lachesis Group0                      | 992                        | 144,591,505                     |
| Lachesis Group1                      | 983                        | 135,993,026                     |
| Lachesis Group2                      | 841                        | 119,381,364                     |
| Lachesis Group3                      | 568                        | 118,168,319                     |
| Lachesis Group4                      | 701                        | 108,152,317                     |
| Lachesis Group5                      | 643                        | 105,122,070                     |
| Lachesis Group6                      | 560                        | 95,926,108                      |
| Lachesis Group7                      | 601                        | 83,529,524                      |
| Lachesis Group8                      | 575                        | 83,604,872                      |
| Lachesis Group9                      | 548                        | 77,986,713                      |
| Lachesis Group10                     | 546                        | 77,939,050                      |
| Lachesis Group11                     | 486                        | 71,480,007                      |
| Lachesis Group12                     | 375                        | 70,748,615                      |
| Lachesis Group13                     | 514                        | 70,304,449                      |
| Lachesis Group14                     | 529                        | 69,875,511                      |
| Lachesis Group15                     | 494                        | 69,493,039                      |
| Lachesis Group16                     | 603                        | 68,551,582                      |
| Lachesis Group17                     | 529                        | 65,311,672                      |
| Lachesis Group18                     | 382                        | 42,497,259                      |
| Total Sequences Clustered (Ratio %)  | 11,470 (99.20)             | 1,678,657,002(99.66)            |
| Total Sequences Ordered and Oriented | 8,689(75.75)               | 1,531,087,320(91.21)            |

**Table S6.** The repetitive sequences of *M. officinalis*. Related to Table 1

| Type               | Number    | Length        | Rate (%) |
|--------------------|-----------|---------------|----------|
| <b>ClassI</b>      | 2,645,203 | 1,196,475,697 | 71.00    |
| ClassI/DIRS        | 139,036   | 105,317,930   | 6.25     |
| ClassI/LARD        | 1,056,904 | 402,713,815   | 23.90    |
| ClassI/LINE        | 156,049   | 50,266,419    | 2.98     |
| ClassI/LTR/Copia   | 593,974   | 355,691,881   | 21.11    |
| ClassI/LTR/Gypsy   | 645,893   | 463,875,128   | 27.53    |
| ClassI/LTR/Unknown | 15,897    | 7,168,871     | 0.43     |
| ClassI/PLE         | 6,899     | 3,164,692     | 0.19     |
| ClassI/SINE        | 10,692    | 2,008,171     | 0.12     |
| ClassI/TRIM        | 16,503    | 12,059,312    | 0.72     |
| ClassI/Unknown     | 3,356     | 952,288       | 0.06     |
| <b>ClassII</b>     | 199,143   | 95,899,299    | 5.69     |
| ClassII/Crypton    | 19        | 1,181         | 0.00     |
| ClassII/Helitron   | 26,147    | 7,612,587     | 0.45     |
| ClassII/MITE       | 22,139    | 5,501,550     | 0.33     |
| ClassII/Maverick   | 8,262     | 4,064,803     | 0.24     |
| ClassII/TIR        | 138,169   | 77,885,592    | 4.62     |
| ClassII/Unknown    | 4,407     | 1,452,070     | 0.09     |
| PotentialHostGene  | 46,118    | 11,398,385    | 0.68     |
| SSR                | 8,450     | 8,797,374     | 0.52     |
| Unknown            | 722,215   | 211,549,783   | 12.55    |
| <b>Total</b>       | 3,621,129 | 1,372,402,279 | 81.44    |

**Table S7.** Noncoding RNA prediction of *M. officinalis*. Related to Table 1

| Type  | Number | Family |
|-------|--------|--------|
| rRNA  | 449    | 4      |
| tRNA  | 575    | 24     |
| miRNA | 72     | 24     |



**Table S8.** Gene functional annotation of *M. officinalis* based on different database.  
Related to Table 1

| Database | Annotated number | Percentage (%) |
|----------|------------------|----------------|
| GO       | 13,438           | 57.37          |
| KEGG     | 8,253            | 35.23          |
| KOG      | 13,845           | 59.11          |
| TrEMBL   | 23,024           | 98.29          |
| NR       | 23,035           | 98.34          |
| ALL      | 23,050           | 98.40          |

**Table S9.** GO functional annotation in *M. officinalis*. Related to Fig. S2

| <b>Functional category</b> | <b>Term description</b>                            | <b>gene number</b> |
|----------------------------|----------------------------------------------------|--------------------|
| cellular component         | extracellular region                               | 393                |
| cellular component         | cell                                               | 5621               |
| cellular component         | nucleoid                                           | 10                 |
| cellular component         | membrane                                           | 3206               |
| cellular component         | virion                                             | 3                  |
| cellular component         | cell junction                                      | 230                |
| cellular component         | membrane-enclosed lumen                            | 174                |
| cellular component         | macromolecular complex                             | 1480               |
| cellular component         | organelle                                          | 4181               |
| cellular component         | extracellular region part                          | 8                  |
| cellular component         | organelle part                                     | 2030               |
| cellular component         | virion part                                        | 3                  |
| cellular component         | membrane part                                      | 1419               |
| cellular component         | cell part                                          | 5675               |
| cellular component         | supramolecular complex                             | 61                 |
| molecular function         | transcription factor activity, protein binding     | 28                 |
| molecular function         | nucleic acid binding transcription factor activity | 156                |
| molecular function         | catalytic activity                                 | 7252               |
| molecular function         | signal transducer activity                         | 121                |
| molecular function         | structural molecule activity                       | 446                |
| molecular function         | transporter activity                               | 869                |
| molecular function         | binding                                            | 6180               |
| molecular function         | electron carrier activity                          | 267                |
| molecular function         | antioxidant activity                               | 158                |
| molecular function         | metallochaperone activity                          | 3                  |
| molecular function         | protein tag                                        | 2                  |
| molecular function         | translation regulator activity                     | 1                  |
| molecular function         | nutrient reservoir activity                        | 55                 |
| molecular function         | molecular transducer activity                      | 66                 |
| molecular function         | molecular function regulator                       | 92                 |
| biological process         | reproduction                                       | 685                |
| biological process         | cell killing                                       | 1                  |
| biological process         | immune system process                              | 165                |
| biological process         | metabolic process                                  | 7709               |
| biological process         | cellular process                                   | 7053               |
| biological process         | reproductive process                               | 679                |
| biological process         | biological adhesion                                | 34                 |
| biological process         | signaling                                          | 502                |
| biological process         | multicellular organismal process                   | 809                |

|                    |                                    |      |
|--------------------|------------------------------------|------|
| biological process | developmental process              | 1213 |
| biological process | growth                             | 239  |
| biological process | locomotion                         | 11   |
| biological process | single-organism process            | 5381 |
| biological process | biological phase                   | 40   |
| biological process | rhythmic process                   | 22   |
| biological process | response to stimulus               | 2538 |
| biological process | localization                       | 1946 |
| biological process | multi-organism process             | 410  |
| biological process | biological regulation              | 2173 |
| biological process | cellular component organization or |      |
|                    | biogenesis                         | 1469 |
| biological process | detoxification                     | 205  |

---

**Table S10.** KEGG functional annotation in *M. officinalis*. Related to Fig. S2

| <b>pathway</b>                | <b>Pathway id</b> | <b>Gene number</b> |
|-------------------------------|-------------------|--------------------|
| Carbon metabolism             | ko01200           | 237                |
| Biosynthesis of amino acids   | ko01230           | 217                |
| Starch and sucrose metabolism | ko00500           | 207                |
| Phenylpropanoid biosynthesis  | ko00940           | 190                |

**Table S12** Gene family classification statistics. Related to Fig. 3

|                       | Number of genes | Number of genes in orthogroups | Number of orthogroups containing species | Number of species-specific orthogroups | Number of genes in species-specific orthogroups |
|-----------------------|-----------------|--------------------------------|------------------------------------------|----------------------------------------|-------------------------------------------------|
| <i>A. thaliana</i>    | 27,449          | 18,388                         | 12,533                                   | 2,482                                  | 6,715                                           |
| <i>A. trichopoda</i>  | 16,839          | 15,516                         | 12,770                                   | 191                                    | 602                                             |
| <i>C. kanehirae</i>   | 26,531          | 23,777                         | 14,908                                   | 218                                    | 630                                             |
| <i>C. sinensis</i>    | 50,447          | 43,514                         | 18,792                                   | 2,475                                  | 11,923                                          |
| <i>G. biloba</i>      | 32,831          | 20,958                         | 10,780                                   | 1,496                                  | 5,863                                           |
| <i>L.chinense</i>     | 35,269          | 30,992                         | 15,076                                   | 968                                    | 9,416                                           |
| <i>L. cubeba</i>      | 30,805          | 26,113                         | 16,149                                   | 475                                    | 1,364                                           |
| <i>M. officinalis</i> | 23,424          | 21,966                         | 14,082                                   | 202                                    | 582                                             |
| <i>N. colorata</i>    | 31,475          | 22,474                         | 13,640                                   | 1,207                                  | 5,511                                           |
| <i>O. sativa</i>      | 28,043          | 20,456                         | 16,392                                   | 781                                    | 2,199                                           |
| <i>P. americana</i>   | 22,440          | 19,573                         | 14,562                                   | 131                                    | 283                                             |
| <i>P. nigrum</i>      | 62,669          | 44,856                         | 18,455                                   | 4,127                                  | 14,889                                          |
| <i>P. trichocarpa</i> | 31,453          | 29,858                         | 16,365                                   | 798                                    | 2,879                                           |
| <i>Z. mays</i>        | 34,104          | 29,557                         | 18,035                                   | 1,517                                  | 5,198                                           |

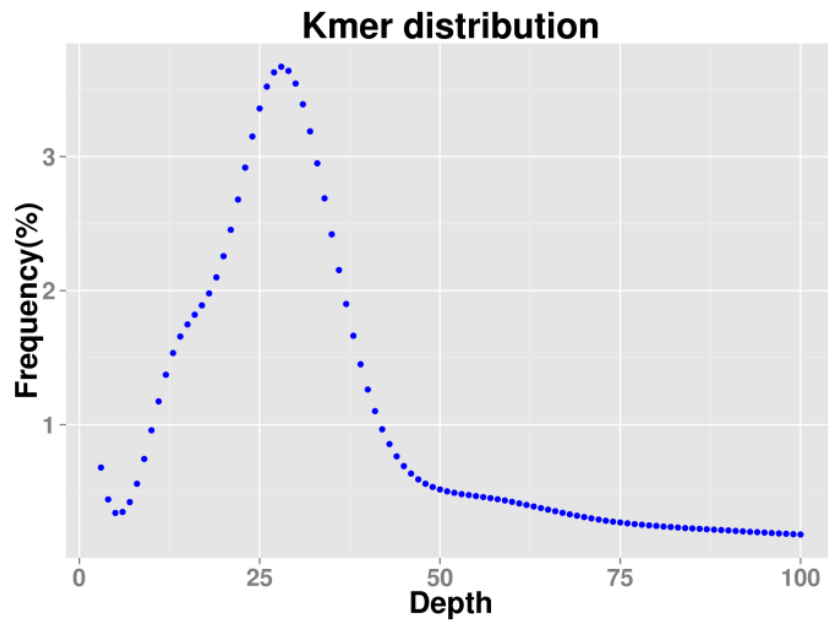

**Fig. S1** K-mer frequency distribution curve of the *M. officinalis* genome. The horizontal axis represents the depth of coverage of the k-mer, and the vertical axis represents the frequency of the depth of the k-mer. The results showed that the average k-mer depth corresponding to the main peak was 28, with a total of 49,503,852,345 k-mers were used. The genome size was estimated based on the formula: Genome size = total k-mer number/average k-mer depth. Thus, we estimated *M. officinalis* genome size was approximately 1.76 Gb. Related to Fig. 2.

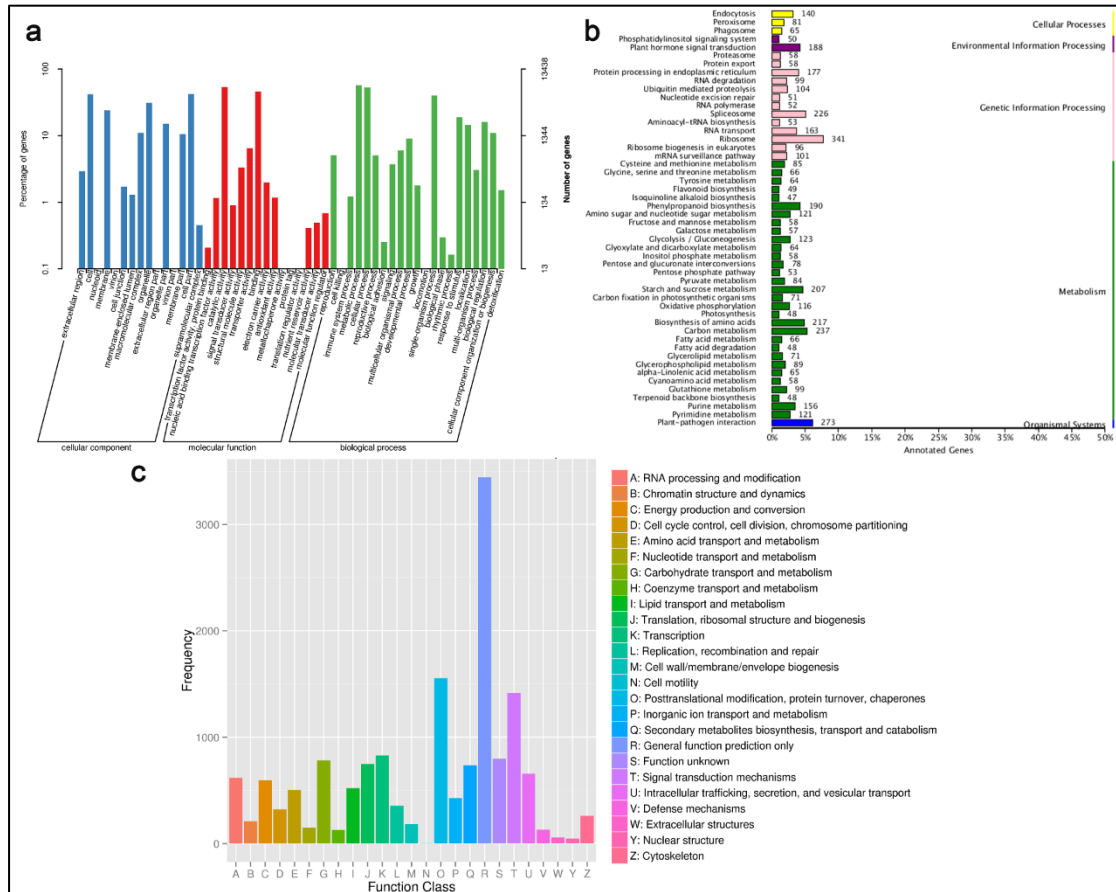

**Fig. S2** Results of genomic enrichment analysis of *M. officinalis*. (a) Gene ontology categories of the annotated genes. The y-axis represents the count of genes identified in this study. The genes were annotated in three main categories: cellular component, molecular function and biological process (x-axis). (b) KEGG pathway of the annotated genes. The genes were annotated in many pathways. (c) KOG categories of the annotated genes. The KOG database can be divided into 26 categories by function. Related to Table S8.

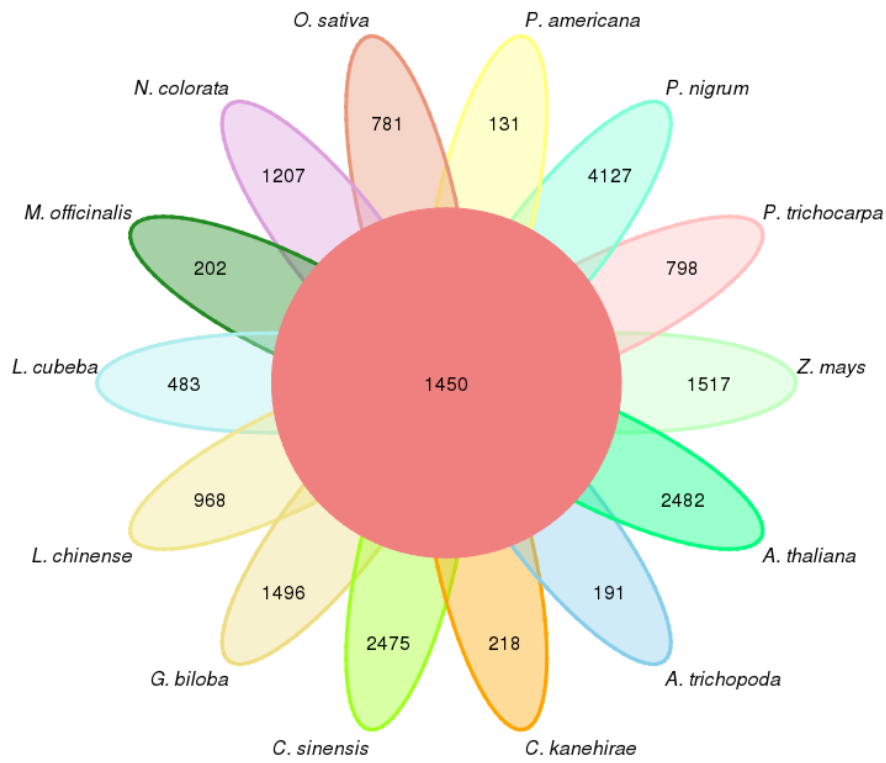

**Fig. S3** Venn diagram of shared gene families in 14 species. The number of gene families is listed for each component. Related to Fig. 3.



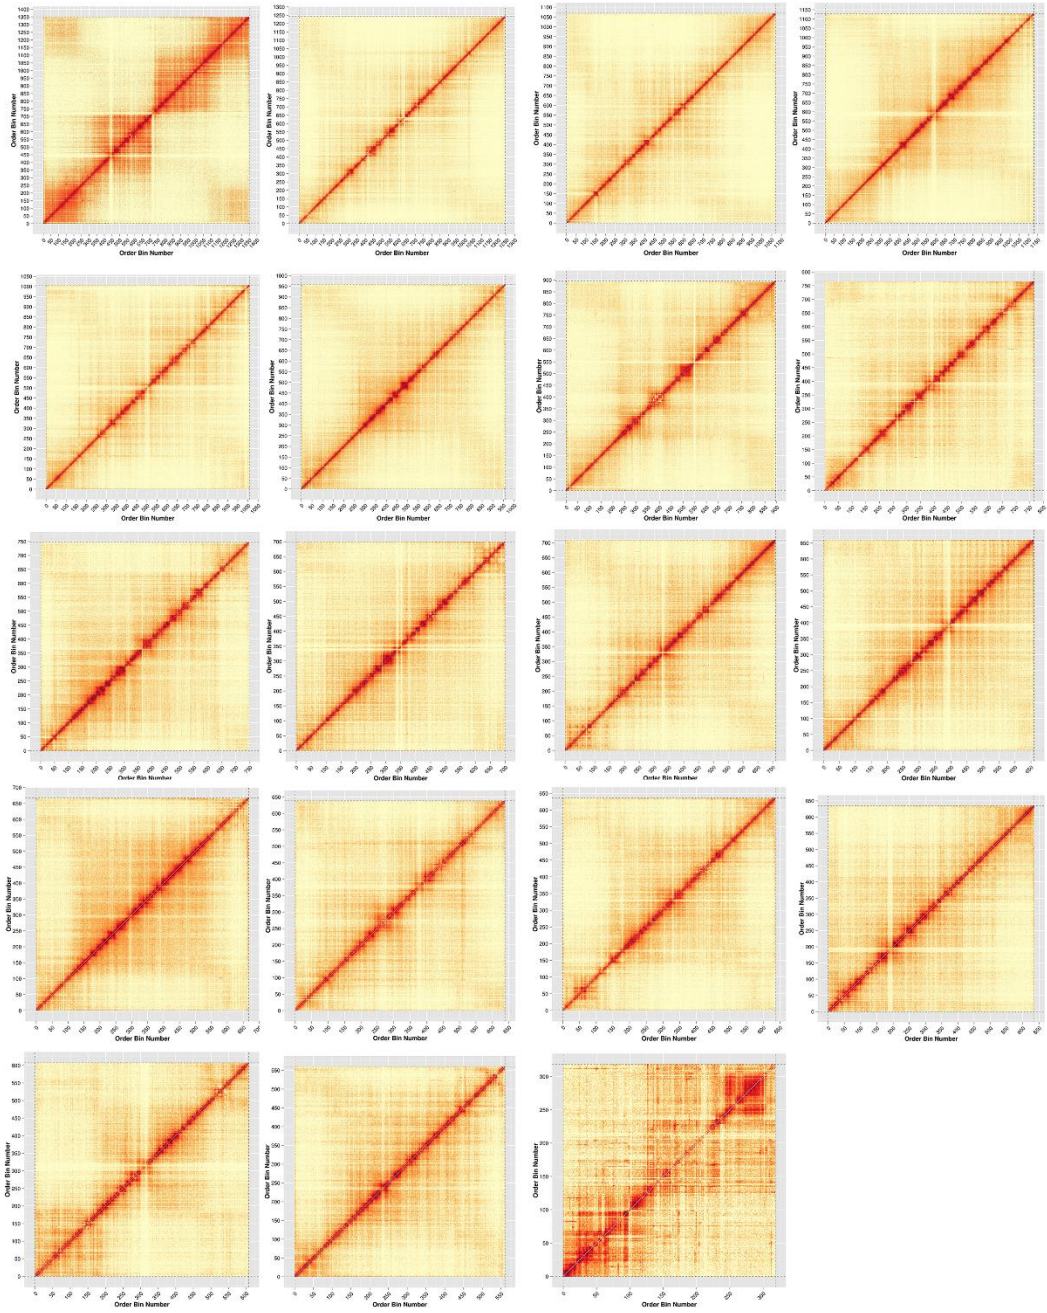

**Fig. S4** Chromatin interactions in each chromosome of *M. officinalis*. The Hi-C data in *M. officinalis* were mapped to the *M. officinalis* genome. Related to Fig. 2.
